# Supplementary material
Source: PubMed Central journal article supplement (PMC6145763)
Supplement: jamaneurol-e180492-s002.pdf [file jamaneurol-e180492-s002.pdf]

## Supplementary Online Content

Malfliet A, Kregel J, Coppieters I, et al. Effect of pain neuroscience education combined with cognition-targeted motor control training on chronic spinal pain: a randomized clinical trial. *JAMA Neurol*. Published online April 16, 2018.  
doi:10.1001/jamaneurol.2018.0492

**eAppendix.** Detailed Information on MRI Scan and Preprocessing of MRI Data in FreeSurfer

**eTable 1.** Main Differences Between the Two Treatment Arms

**eTable 2.** Effect of Physiotherapy Treatment on Gray Matter Cortical Thickness and Subcortical Volumes in People With Chronic Spinal Pain (n=120)

**eFigure 1.** Pain Neuroscience Education Combined With Cognition-Targeted Motor Control Training Is Effective for Increasing Pain Pressure Thresholds (A) and for Reducing Self-Reported Symptoms of Hypersensitivity for Nonmusculoskeletal Stimuli (B; Central Sensitization Inventory), Compared to Best Evidence Physiotherapy in Patients with Chronic Spinal Pain (n=120)

**eFigure 2.** Pain Neuroscience Education Combined With Cognition-Targeted Motor Control Training Is Effective for Reducing Disability (A), for Increasing Perceived Mental Health (B), and for Increasing Perceived Physical Health (C), Compared to Best Evidence Physiotherapy in Patients with Chronic Spinal Pain (n=120)

**eFigure 3.** Pain Neuroscience Education Combined With Cognition-Targeted Motor Control Training Is Effective for Reducing Fear of Movement Pain Pressure Thresholds (A) and for Reducing Pain Vigilance and Awareness (B), Compared to Best Evidence Physiotherapy in Patients with Chronic Spinal Pain (n=120)

This supplementary material has been provided by the authors to give readers additional information about their work.

## **eAppendix.** Detailed Information on MRI Scan and Preprocessing of MRI Data in FreeSurfer

High-resolution T1-weighted images were acquired using a three-dimensional magnetization prepared rapid acquisition gradient echo: 256x256 matrix, repetition time=2250ms, echo time=4.18ms, flip angle=9°, 176 slices, 1mm slice thickness, field of view=25.6x25.6cm, acquisition time=5'14". Images were visually checked for motion distortion.

Following steps were conducted using FreeSurfer v5.3.0: (1) skull stripping using hybrid watershed/surface deformation<sup>1</sup>; (2) automated transformation to Talairach space; (3) intensity normalization<sup>2</sup>; (4) subject-specific segmentation of subcortical white matter and deep gray matter volumetric structures<sup>3</sup>; and (5) calculation of cortical thickness/volume of ten a-priori selected cortical regions based on the Desikan gyral parcellation<sup>4</sup> (caudal middle frontal, inferior parietal, inferior temporal, medial orbitofrontal, parahippocampal, postcentral, precentral, rostral middle frontal, superior parietal, and supramarginal gyri) and volumes of five a-priori selected regions from the FreeSurfer subcortical segmentation (amygdala, caudate, hippocampus, putamen, and thalamus).<sup>3</sup>.

### **eReferences**

1. Segonne F, Dale AM, Busa E, et al. A hybrid approach to the skull stripping problem in MRI. *Neuroimage*. 2004;22(3):1060-1075. doi:10.1016/j.neuroimage.2004.03.032.
2. Sled JG, Zijdenbos AP, Evans AC. A nonparametric method for automatic correction of intensity nonuniformity in MRI data. *IEEE Trans Med Imaging*. 1998;17(1):87-97. doi:10.1109/42.668698.
3. Fischl B, Salat DH, Busa E, et al. Whole brain segmentation: automated labeling of neuroanatomical structures in the human brain. *Neuron*. 2002;33(3):341-355.
4. Desikan RS, Ségonne F, Fischl B, et al. An automated labeling system for subdividing the human cerebral cortex on MRI scans into gyral based regions of interest. *Neuroimage*. 2006;31(3):968-980. doi:10.1016/j.neuroimage.2006.01.021.

**eTable 1.** Main Differences Between the Two Treatment Arms

| <b>Experimental treatment</b>                                                                                   | <b>Control treatment</b>                                                                      |
|-----------------------------------------------------------------------------------------------------------------|-----------------------------------------------------------------------------------------------|
| Pain Neuroscience Education                                                                                     | Traditional Back/Neck School                                                                  |
| Cognition-Targeted, Biopsychosocial Approach                                                                    | Biomedical Approach                                                                           |
| Time-Contingent Exercise Program<br>("Perform this exercise 10 times regardless the symptoms it might induce.") | Pain-Contingent Exercise Program<br>("Stop or adapt the exercise as soon as symptoms occur.") |

**eTable 2.** Effect of Physiotherapy Treatment on Gray Matter Cortical Thickness and Subcortical Volumes in People With Chronic Spinal Pain

(n=120)

|                                                |      | Experimental treatment |                           | Control treatment |                           | Mean group Difference [95% CI] | Main effect of Time | Interaction effect | Bonferoni Post-Hoc tests                                                         |
|------------------------------------------------|------|------------------------|---------------------------|-------------------|---------------------------|--------------------------------|---------------------|--------------------|----------------------------------------------------------------------------------|
|                                                |      | Mean±SD                | % change rel. to baseline | Mean±SD           | % change rel. to baseline |                                |                     |                    |                                                                                  |
| <i>Left hemisphere cortical thickness (mm)</i> |      |                        |                           |                   |                           |                                |                     |                    |                                                                                  |
| Caudal middle frontal                          | Base | 2.661±.017             | -                         | 2.618±.017        | -                         | .043<br>[-.004,.090]           | F=17.122<br>p<.001  | F=.577<br>p=.56    | Time<br>12mo<Base,3mo<br>p=.001 p<.001 <sup>a</sup><br>p=.02, p=.01 <sup>b</sup> |
|                                                | 3mo  | 2.664±.019             | +1.1%                     | 2.617±.019        | -.04%                     | .047<br>[-.007,.101]           |                     |                    |                                                                                  |
|                                                | 12mo | 2.625±.018             | -1.46%                    | 2.591±.018        | -.99%                     | .034<br>[-.016,.083]           |                     |                    |                                                                                  |
| Inferior parietal                              | Base | 2.493±.015             | -                         | 2.468±.015        | -                         | .025<br>[-.018,.068]           | F=6.699<br>p=.002   | F=.995<br>p=.37    | Time<br>3mo<Base<br>p=.02 <sup>a</sup>                                           |
|                                                | 3mo  | 2.469±.018             | -.96%                     | 2.447±.018        | -.85%                     | .021<br>[-.029,.072]           |                     |                    |                                                                                  |
|                                                | 12mo | 2.476±.016             | +2.8%                     | 2.472±.016        | +1.02%                    | .004<br>[-.041,.048]           |                     |                    |                                                                                  |
| Inferior temporal                              | Base | 2.719±.018             | -                         | 2.708±.017        | -                         | .010<br>[-.039,.060]           | F=.387<br>p=.68     | F=1.129<br>p=.33   |                                                                                  |
|                                                | 3mo  | 2.721±.020             | +0.7%                     | 2.693±.020        | -.55%                     | .029<br>[-.029,.086]           |                     |                    |                                                                                  |
|                                                | 12mo | 2.727±.021             | +2.2%                     | 2.692±.022        | -.04%                     | .035<br>[-.025,.095]           |                     |                    |                                                                                  |
| Medial orbito-frontal                          | Base | 2.500±.020             | -                         | 2.417±.020        | -                         | .082<br>[.026,.138]            | F=2.126<br>p=.13    | F=2.801<br>p=.07   | Group<br>Base: p=.004<br>3mo: p=.02<br>12mo: p=.09                               |
|                                                | 3mo  | 2.483±.020             | -.68%                     | 2.414±.020        | -.12%                     | .069<br>[.012,.126]            |                     |                    |                                                                                  |
|                                                | 12mo | 2.467±.019             | -.64%                     | 2.420±.019        | +2.5%                     | .047<br>[-.007,.101]           |                     |                    |                                                                                  |

|                        |      |            |        |            |        |                       |                    |                 |      |                                                                                |
|------------------------|------|------------|--------|------------|--------|-----------------------|--------------------|-----------------|------|--------------------------------------------------------------------------------|
| Parahippocampal        | Base | 2.804±.035 | -      | 2.807±.035 | -      | -0.04<br>[-.103,.095] | F=.746<br>p=.48    | F=.012<br>p=.99 |      |                                                                                |
|                        | 3mo  | 2.801±.038 | -11%   | 2.803±.038 | -14%   | -0.02<br>[-.109,.105] |                    |                 |      |                                                                                |
|                        | 12mo | 2.794±.037 | -25%   | 2.798±.037 | -18%   | -0.04<br>[-.107,.099] |                    |                 |      |                                                                                |
| Postcentral            | Base | 2.214±.015 | -      | 2.192±.015 | -      | .022<br>[-.020,.064]  | F=2.149<br>p=.12   | F=.090<br>p=.91 |      |                                                                                |
|                        | 3mo  | 2.210±.016 | -18%   | 2.186±.016 | -27%   | .024<br>[-.021,.069]  |                    |                 |      |                                                                                |
|                        | 12mo | 2.207±.016 | -14%   | 2.180±.015 | -27%   | .026<br>[-.019,.071]  |                    |                 |      |                                                                                |
| Precentral             | Base | 2.713±.017 | -      | 2.674±.017 | -      | .039<br>[-.009,.086]  | F=1.381<br>p=.26   | F=.165<br>p=.85 |      |                                                                                |
|                        | 3mo  | 2.710±.018 | -11%   | 2.673±.018 | -0.4%  | .037<br>[-.014,.089]  |                    |                 |      |                                                                                |
|                        | 12mo | 2.707±.017 | -11%   | 2.663±.017 | -3.7%  | .043<br>[-.004,.090]  |                    |                 |      |                                                                                |
| Rostral middle frontal | Base | 2.458±.016 | -      | 2.436±.016 | -      | .022<br>[-.024,.067]  | F=10.545<br>p<.001 | F=.063<br>p=.94 | Time | 12mo<3mo<br>p=.008 <sup>a</sup><br>12mo<Base,3mo<br>p=.04, p=.004 <sup>b</sup> |
|                        | 3mo  | 2.467±.017 | +3.7%  | 2.444±.017 | +3.3%  | .023<br>[-.026,.071]  |                    |                 |      |                                                                                |
|                        | 12mo | 2.437±.017 | -1.22% | 2.411±.017 | -1.35% | .026<br>[-.022,.075]  |                    |                 |      |                                                                                |
| Superior parietal      | Base | 2.298±.014 | -      | 2.275±.014 | -      | .024<br>[-.015,.063]  | F=3.976<br>p=.02   | F=.822<br>p=.44 | Time | NS                                                                             |
|                        | 3mo  | 2.284±.016 | -6.1%  | 2.260±.016 | -6.6%  | .024<br>[-.019,.068]  |                    |                 |      |                                                                                |
|                        | 12mo | 2.283±.014 | -0.4%  | 2.272±.014 | +5.3%  | .011<br>[-.029,.052]  |                    |                 |      |                                                                                |
| Supra-marginal         | Base | 2.634±.015 | -      | 2.622±.015 | -      | .012<br>[-.030,.054]  | F=1.435<br>p=.24   | F=.039<br>p=.96 |      |                                                                                |
|                        | 3mo  | 2.627±.017 | -2.7%  | 2.616±.017 | -2.3%  | .011<br>[-.036,.058]  |                    |                 |      |                                                                                |
|                        | 12mo | 2.628±.015 | +0.4%  | 2.614±.015 | -0.8%  | .014                  |                    |                 |      |                                                                                |

|                                                 |      |            |       |            |        |                      | [-.028,.056]             |                  |      |                                        |
|-------------------------------------------------|------|------------|-------|------------|--------|----------------------|--------------------------|------------------|------|----------------------------------------|
| <i>Right hemisphere cortical thickness (mm)</i> |      |            |       |            |        |                      |                          |                  |      |                                        |
| <b>Caudal middle frontal</b>                    | Base | 2.555±.016 | -     | 2.540±.016 | -      | .015<br>[-.029,.059] | F=2.502<br>p=.09         | F=1.071<br>p=.35 |      |                                        |
|                                                 | 3mo  | 2.559±.016 | +15%  | 2.525±.016 | -.59%  | .034<br>[-.010,.078] |                          |                  |      |                                        |
|                                                 | 12mo | 2.545±.016 | -.55% | 2.522±.016 | -.12%  | .022<br>[-.022,.066] |                          |                  |      |                                        |
| <b>Inferior parietal</b>                        | Base | 2.563±.017 | -     | 2.541±.017 | -      | .022<br>[-.024,.069] | F=2.658<br>p=.08         | F=.236<br>p=.79  |      |                                        |
|                                                 | 3mo  | 2.557±.018 | -.23% | 2.527±.018 | -.55%  | .029<br>[-.021,.080] |                          |                  |      |                                        |
|                                                 | 12mo | 2.554±.016 | -.12% | 2.528±.016 | +04%   | .026<br>[-.020,.072] |                          |                  |      |                                        |
| <b>Inferior temporal</b>                        | Base | 2.817±.017 | -     | 2.805±.017 | -      | .012<br>[-.036,.061] | F=6.097<br><b>p=.003</b> | F=1.094<br>p=.34 | Time | 12mo<Base<br><b>p=.004<sup>b</sup></b> |
|                                                 | 3mo  | 2.817±.018 | -     | 2.794±.018 | -.39%  | .023<br>[-.026,.072] |                          |                  |      |                                        |
|                                                 | 12mo | 2.805±.018 | -.43% | 2.776±.018 | -.64%  | .029<br>[-.021,.079] |                          |                  |      |                                        |
| <b>Medial orbito-frontal</b>                    | Base | 2.323±.023 | -     | 2.309±.023 | -      | .014<br>[-.050,.078] | F=1.078<br>p=.35         | F=1.425<br>p=.25 |      |                                        |
|                                                 | 3mo  | 2.332±.027 | +39%  | 2.290±.027 | -.82%  | .042<br>[-.033,.118] |                          |                  |      |                                        |
|                                                 | 12mo | 2.333±.027 | +04%  | 2.321±.027 | +1.35% | .012<br>[-.063,.086] |                          |                  |      |                                        |
| <b>Parahippo-campal</b>                         | Base | 2.824±.032 | -     | 2.811±.032 | -      | .013<br>[-.076,.102] | F=1.897<br>p=.16         | F=1.174<br>p=.31 |      |                                        |
|                                                 | 3mo  | 2.820±.034 | -.14% | 2.788±.034 | -.82%  | .031<br>[-.065,.128] |                          |                  |      |                                        |
|                                                 | 12mo | 2.830±.033 | +35%  | 2.801±.033 | +47%   | .029<br>[-.064,.122] |                          |                  |      |                                        |
| <b>Postcentral</b>                              | Base | 2.183±.015 | -     | 2.173±.015 | -      | .010<br>[-.053,.032] | F=5.988<br>p=.004        | F=1.829<br>p=.17 | Time | 12mo<Base<br><b>p=.006<sup>b</sup></b> |
|                                                 | 3mo  | 2.191±.017 | +37%  | 2.162±.017 | -.51%  | .029<br>[-.019,.078] |                          |                  |      |                                        |

|                                                             |      |                     |       |                     |       |                              |                              |                         |       |                                                               |
|-------------------------------------------------------------|------|---------------------|-------|---------------------|-------|------------------------------|------------------------------|-------------------------|-------|---------------------------------------------------------------|
|                                                             | 12mo | 2.177±.016          | -.64% | 2.152±.016          | -.46% | .025<br>[-.020,.070]         |                              |                         |       |                                                               |
| <b>Precentral</b>                                           | Base | 2.625±.017          | -     | 2.571±.017          | -     | .054<br>[-.102,-.005]        | F=4.479<br><b>p=.01</b>      | F=.333<br>p=.72         | Group | Base: <b>p=.03</b><br>3mo: <b>p=.03</b><br>12mo: <b>p=.01</b> |
|                                                             | 3mo  | 2.624±.019          | -.04% | 2.564±.019          | -.27% | .060<br>[.007,.112]          |                              |                         |       |                                                               |
|                                                             | 12mo | 2.614±.018          | -.38% | 2.552±.018          | -.47% | .062<br>[.013,.111]          |                              |                         | Time  | 12mo<Base<br><b>p=.05<sup>b</sup></b>                         |
| <b>Rostral middle frontal</b>                               | Base | 2.270±.015          | -     | 2.266±.015          | -     | .004<br>[.039,.047]          | F=.209<br>p=.81              | F=1.961<br>p=.15        |       |                                                               |
|                                                             | 3mo  | 2.285±.017          | +66%  | 2.257±.017          | -.40% | .028<br>[-.019,.074]         |                              |                         |       |                                                               |
|                                                             | 12mo | 2.271±.017          | -.61% | 2.263±.017          | +27%  | .008<br>[-.039,.054]         |                              |                         |       |                                                               |
| <b>Superior parietal</b>                                    | Base | 2.273±.014          | -     | 2.260±.014          | -     | .013<br>[-.026,.051]         | F=2.416<br>p=.10             | F=.796<br>p=.46         |       |                                                               |
|                                                             | 3mo  | 2.269±.016          | -.18% | 2.244±.016          | -.71% | .026<br>[-.018,.069]         |                              |                         |       |                                                               |
|                                                             | 12mo | 2.264±.014          | -.22% | 2.247±.014          | +13%  | .017<br>[-.023,.057]         |                              |                         |       |                                                               |
| <b>Supra-marginal</b>                                       | Base | 2.654±.015          | -     | 2.629±.015          | -     | .025<br>[-.067,.017]         | F=7.873<br><b>p=.001</b>     | F=3.341<br><b>p=.04</b> | Group | Base: p=.239<br>3mo: <b>p=.05</b><br>12mo: <b>p=.03</b>       |
|                                                             | 3mo  | 2.660±.016          | +23%  | 2.614±.016          | -.57% | .046<br>[.000,.093]          |                              |                         |       |                                                               |
|                                                             | 12mo | 2.646±.015          | -.53% | 2.598±.016          | -.61% | .049<br>[.005,.092]          |                              |                         | Time  | 12mo<Base<br><b>p&lt;.001<sup>b</sup></b>                     |
| <i>Left hemisphere subcortical volumes (mm<sup>3</sup>)</i> |      |                     |       |                     |       |                              |                              |                         |       |                                                               |
| <b>Amygdala</b>                                             | Base | 1628.972±<br>27.464 | -     | 1615.457±<br>27.245 | -     | 13.516<br>[-63.117,90.148]   | F=.033<br>p=.97              | F=.056<br>p=.95         |       |                                                               |
|                                                             | 3mo  | 1627.242±<br>29.188 | -.10% | 1613.691±<br>29.130 | -.11% | 13.551<br>[-68.125,95.227]   |                              |                         |       |                                                               |
|                                                             | 12mo | 1625.975±<br>27.896 | -.08% | 1615.926±<br>27.802 | +14%  | 9.869<br>[-69.139,87.877]    |                              |                         |       |                                                               |
| <b>Caudate</b>                                              | Base | 3771.990±<br>61.461 | -     | 3856.723±<br>60.942 | -     | -84.733<br>[-256.180,86.711] | F=19.205<br><b>p&lt;.001</b> | F=1.403<br>p=.25        | Time  | 12mo<Base<br><b>p=.003<sup>a</sup></b><br>Base>3mo,Base       |
|                                                             | 3mo  | 3762.799±           | -.24% | 3831.726±           | -.65% | -68.927                      |                              |                         |       |                                                               |

|                                                              |      |                      |       |                      |       |                                |                          |                  |      |                                        |                                      |
|--------------------------------------------------------------|------|----------------------|-------|----------------------|-------|--------------------------------|--------------------------|------------------|------|----------------------------------------|--------------------------------------|
|                                                              |      | 61.317               |       | 60.840               |       | [-240.020,102.168]             |                          |                  |      |                                        | <b>p=.010, p&lt;.001<sup>b</sup></b> |
|                                                              | 12mo | 3744.945±<br>60.344  | -.47% | 3814.055±<br>59.888  | -.46% | -69.110<br>[-237.510,99.287]   |                          |                  |      |                                        |                                      |
| <b>Hippocampus</b>                                           | Base | 4259.190±<br>50.740  | -     | 4239.139±<br>50.320  | -     | 20.051<br>[-121.500,161.601]   | F=.073<br>p=.93          | F=.310<br>p=.74  |      |                                        |                                      |
|                                                              | 3mo  | 4257.386±<br>54.058  | -.04% | 4236.183±<br>53.706  | -.07% | 21.203<br>[-129,740,172.144]   |                          |                  |      |                                        |                                      |
|                                                              | 12mo | 4262.506±<br>52.900  | +.12% | 4229.784±<br>52.602  | -.15% | 32.722<br>[-115.050,180.493]   |                          |                  |      |                                        |                                      |
| <b>Putamen</b>                                               | Base | 5837.205±<br>88.902  | -     | 5736.388±<br>88.165  | -     | 100.818<br>[-147.200,348.833]  | F=3.258<br><b>p=.043</b> | F=.846<br>p=.43  | Time | 12mo<Base<br><b>p=.03<sup>a</sup></b>  |                                      |
|                                                              | 3mo  | 5816.908±<br>89.305  | -.35% | 5719.808±<br>88.691  | -.29% | 97.099<br>[-152.210,346.409]   |                          |                  |      |                                        |                                      |
|                                                              | 12mo | 5785.682±<br>86.948  | -.54% | 5716.809±<br>86.434  | -.05% | 68.872<br>[-173.990,311.735]   |                          |                  |      |                                        |                                      |
| <b>Thalamus*</b>                                             | Base | 8185.162±<br>126.307 | -     | 8348.874±<br>126.307 | -     | -163.712<br>[-517.566,190.142] | F=.001<br>p=.99          | F=.043<br>p=.96  |      |                                        |                                      |
|                                                              | 3mo  | 8217.104±<br>132.604 | +.39% | 8303.986±<br>137.152 | -.54% | -86.882<br>[-466.064,292.300]  |                          |                  |      |                                        |                                      |
|                                                              | 12mo | 8202.495±<br>138.960 | -.18% | 8202.495±<br>138.960 | -.02% | -125.279<br>[-526.266,275.708] |                          |                  |      |                                        |                                      |
| <i>Right hemisphere subcortical volumes (mm<sup>3</sup>)</i> |      |                      |       |                      |       |                                |                          |                  |      |                                        |                                      |
| <b>Amygdala</b>                                              | Base | 1578.702±<br>25.125  | -     | 1578.801±<br>24.932  | -     | -.099<br>[-70.212,70.014]      | F=.156<br>p=.87          | F=1.430<br>p=.25 |      |                                        |                                      |
|                                                              | 3mo  | 1591.495±<br>25.994  | +.81% | 1571.365±<br>25.920  | -.47% | -20.130<br>[-52.577,92.836]    |                          |                  |      |                                        |                                      |
|                                                              | 12mo | 1578.295±<br>26.531  | -.83% | 1576.724±<br>26.633  | +.34% | 1.571<br>[-72.889,76.031]      |                          |                  |      |                                        |                                      |
| <b>Caudate</b>                                               | Base | 3843.967±<br>66.509  | -     | 3925.785±<br>66.950  | -     | -82.089<br>[-267.62,103.441]   | F=7.659<br><b>p=.001</b> | F=.808<br>p=.45  | Time | 12mo<Base<br><b>p=.002<sup>a</sup></b> |                                      |
|                                                              | 3mo  | 3822.221±<br>66.811  | -.57% | 3909.923±<br>66.300  | -.40% | -87.702<br>[-274.140,98.740]   |                          |                  |      |                                        |                                      |
|                                                              | 12mo | 3805.259±<br>64.998  | -.44% | 3907.186±<br>65.544  | -.07% | -101.930<br>[-283.370,79.513]  |                          |                  |      |                                        |                                      |
| <b>Hippocamp</b>                                             | Base | 4347.690±<br>54.489  | -     | 4288.487±<br>54.035  | -     | 59.203<br>[-92.802,211.207]    | F=3.420<br><b>p=.04</b>  | F=.550<br>p=.58  | Time | NS                                     |                                      |



|                                                                                                                                                                                                                                                                                                                                                                                                                                                                                                                                                                                                                                                                                                                                                                                                                                                                                                                                                              |      |                      |       |                      |       |                               |                          |                 |      |                                                                               |
|--------------------------------------------------------------------------------------------------------------------------------------------------------------------------------------------------------------------------------------------------------------------------------------------------------------------------------------------------------------------------------------------------------------------------------------------------------------------------------------------------------------------------------------------------------------------------------------------------------------------------------------------------------------------------------------------------------------------------------------------------------------------------------------------------------------------------------------------------------------------------------------------------------------------------------------------------------------|------|----------------------|-------|----------------------|-------|-------------------------------|--------------------------|-----------------|------|-------------------------------------------------------------------------------|
| <b>us</b>                                                                                                                                                                                                                                                                                                                                                                                                                                                                                                                                                                                                                                                                                                                                                                                                                                                                                                                                                    | 3mo  | 4342.358±<br>54.642  | -.12% | 4267.886±<br>54.260  | -.48% | 74.473<br>[-78.058,227.004]   |                          |                 |      |                                                                               |
|                                                                                                                                                                                                                                                                                                                                                                                                                                                                                                                                                                                                                                                                                                                                                                                                                                                                                                                                                              | 12mo | 4330.651±<br>54.494  | -.27% | 4265.546±<br>54.151  | -.05% | 65.105<br>[-87.066,217.276]   |                          |                 |      |                                                                               |
| <b>Putamen</b>                                                                                                                                                                                                                                                                                                                                                                                                                                                                                                                                                                                                                                                                                                                                                                                                                                                                                                                                               | Base | 5485.871±<br>81.086  | -     | 5374.525±<br>80.411  | -     | 111.346<br>[-114.860,337.550] | F=5.921<br><b>p=.004</b> | F=1.245<br>p=29 | Time | 12mo<Base<br><b>p=.03<sup>a</sup></b><br>3mo<Base<br><b>p=.04<sup>b</sup></b> |
|                                                                                                                                                                                                                                                                                                                                                                                                                                                                                                                                                                                                                                                                                                                                                                                                                                                                                                                                                              | 3mo  | 5459.931±<br>80.223  | -.47% | 5335.155±<br>79.657  | -.74% | 124.776<br>[-99.168,348.719]  |                          |                 |      |                                                                               |
|                                                                                                                                                                                                                                                                                                                                                                                                                                                                                                                                                                                                                                                                                                                                                                                                                                                                                                                                                              | 12mo | 5438.656±<br>82.317  | -.39% | 5356.033±<br>81.840  | +.39% | 82.623<br>[-147.320,312.568]  |                          |                 |      |                                                                               |
| <b>Thalamus</b>                                                                                                                                                                                                                                                                                                                                                                                                                                                                                                                                                                                                                                                                                                                                                                                                                                                                                                                                              | Base | 7431.581±<br>101.900 | -     | 7312.849±<br>101.050 | -     | 118.732<br>[-165.530,402.995] | F=5.712<br><b>p=.005</b> | F=.316<br>p=.73 | Time | 12mo<base<br><b>p=.05<sup>a</sup></b>                                         |
|                                                                                                                                                                                                                                                                                                                                                                                                                                                                                                                                                                                                                                                                                                                                                                                                                                                                                                                                                              | 3mo  | 7411.898±<br>100.740 | -.26% | 7311.644±<br>100.006 | -.02% | 100.254<br>[-180.920,381.426] |                          |                 |      |                                                                               |
|                                                                                                                                                                                                                                                                                                                                                                                                                                                                                                                                                                                                                                                                                                                                                                                                                                                                                                                                                              | 12mo | 7377.088±<br>104.319 | -.47% | 7264.063±<br>103.692 | -.65% | 113.025<br>[-178.320,404.369] |                          |                 |      |                                                                               |
| <p>All analyses were performed using Linear Mixed Models. When a variable was assessed for more than two times 'repeated covariance type' was set at 'unstructured'. In regions with (*), convergence could not be achieved and 'repeated covariance type' was set at 'diagonal'.</p> <p>Experimental treatment = pain neuroscience education combined with cognition-targeted motor control training; control treatment = current best evidence physiotherapy</p> <p>Significant p-values, clinical significant improvements and large to very large effect sizes were printed in <b>bold</b>.</p> <p><sup>a</sup>=Results of Bonferroni Post-Hoc tests in the Modern Neuroscience Group; <sup>b</sup>=Results of Bonferroni Post-Hoc tests in the current best evidence physiotherapy group</p> <p>Abbreviations: SD= Standard Deviation; Base= Baseline measurement; 3mo= Measurement at 3 months follow-up; 12mo= Measurement at 12 months follow-up</p> |      |                      |       |                      |       |                               |                          |                 |      |                                                                               |

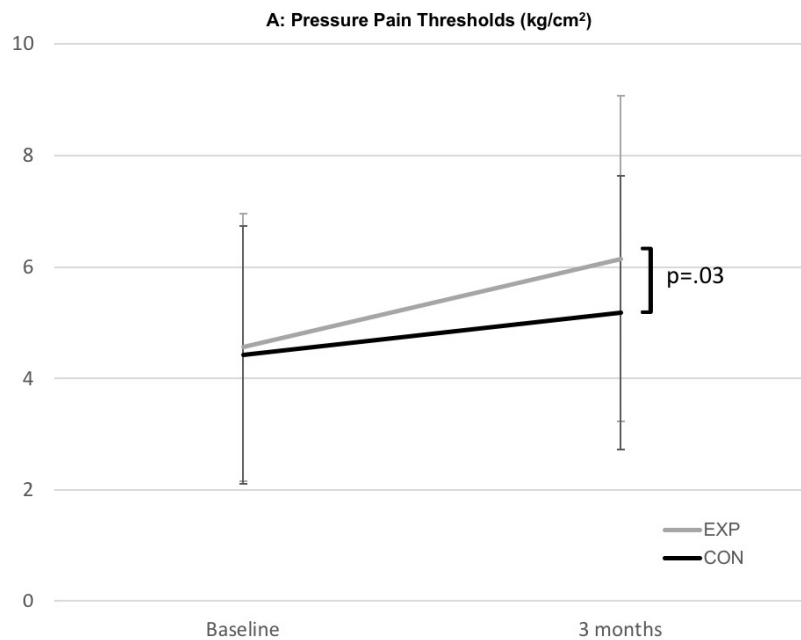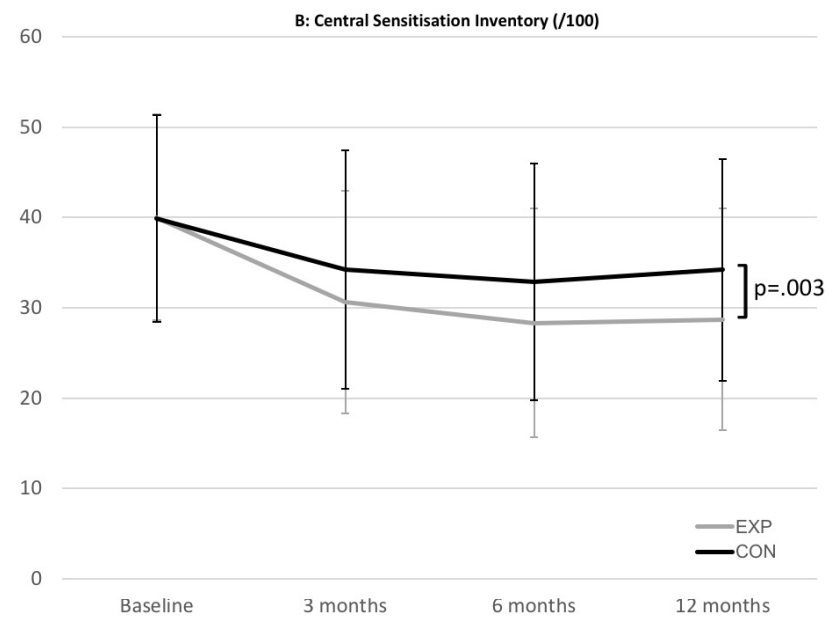

**eFigure 1: Pain neuroscience education combined with cognition-targeted motor control training (EXP) is effective for increasing pain pressure thresholds (A) and for reducing self-reported symptoms of hypersensitivity for non-musculoskeletal stimuli (B; central sensitization inventory), compared to current best evidence physiotherapy (CON) in patients with chronic spinal pain (n=120).**

P-values at the right side of the graph represent significant interaction effects. For detailed results: see table 2. A: Significant increase in the modern neuroscience approach group ( $p < .001$ ) and current best evidence physiotherapy group ( $p = .009$ ). B: Significant higher CSI levels at baseline when compared to 3 months, 6 months and 12 months follow-up in the modern neuroscience approach group ( $p < .001$ ) and the current best evidence physiotherapy group ( $p < .003$ ). Additionally, at 6 months ( $p = .02$ ) and 12 months ( $p = .01$ ) significant lower CSI-levels in the modern neuroscience group compared to the current best evidence physiotherapy group.

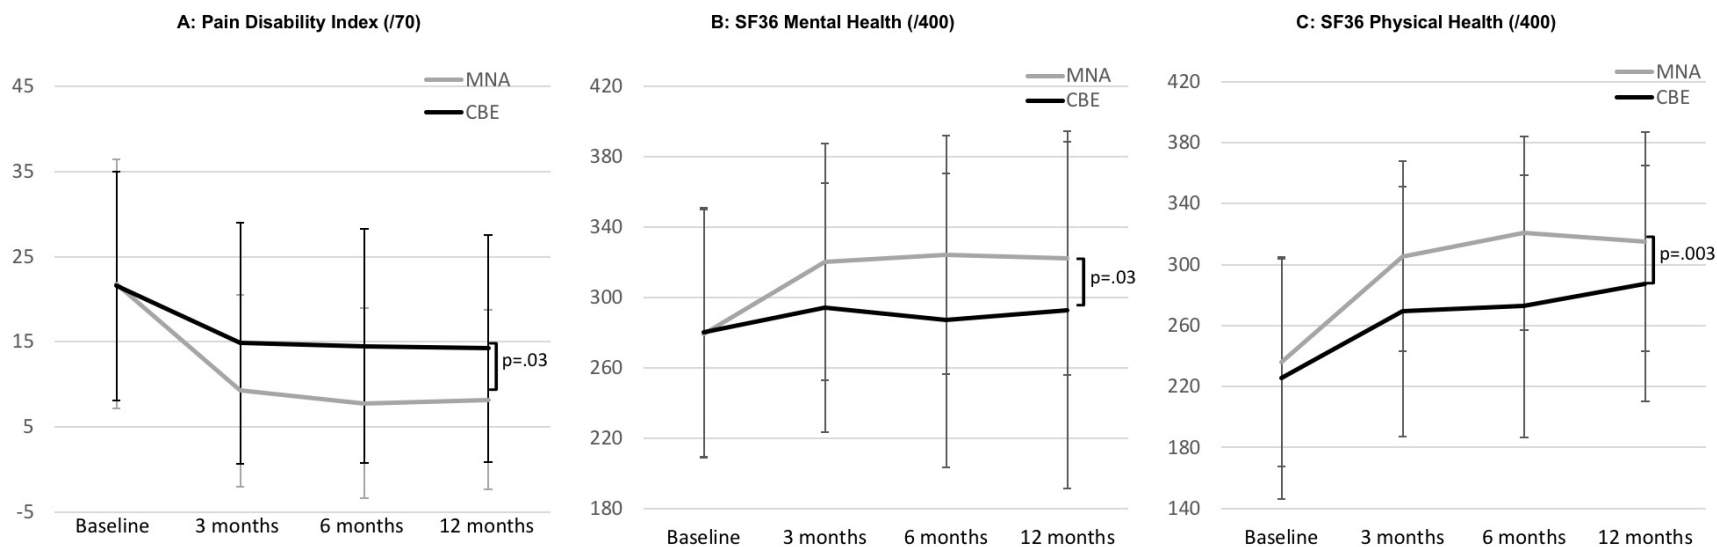

**eFigure 2: Pain neuroscience education combined with cognition-targeted motor control training (EXP) is effective for reducing disability (A), for increasing perceived mental health (B) and for increasing perceived physical health (C), compared to current best evidence physiotherapy (CON) in patients with chronic spinal pain (n=120).**

P-values at the right side of the graph represent significant interaction effects. For detailed results: see table 2. A: Significant lower disability levels at baseline when compared to 3 months, 6 months and 12 months follow-up in the modern neuroscience group ( $p < .001$ ) and the current best evidence physiotherapy group ( $p < .001$ ). Additionally, at 3 months ( $p = .04$ ), 6 months ( $p = .01$ ) and 12 months ( $p = .01$ ) significant lower levels in the modern neuroscience group compared to the current best evidence physiotherapy group. B: Significant higher mental health levels at baseline when compared to 3 months, 6 months and 12 months follow-up in the modern neuroscience group ( $p < .001$ ) and the current best evidence physiotherapy group ( $p < .001$ ). Additionally, at 6 months ( $p = .01$ ) significant higher levels in the modern neuroscience group compared to the current best evidence physiotherapy group. C: Significant higher physical health levels at baseline when compared to 3 months, 6 months and 12 months follow-up in the modern neuroscience group ( $p < .001$ ) and the current best evidence physiotherapy group ( $p < .001$ ). Additionally, at 3 months ( $p = .009$ ) 6 months ( $p < .001$ ) and at 12 months ( $p = .03$ ) significant higher levels in the modern neuroscience group compared to the current best evidence physiotherapy group.

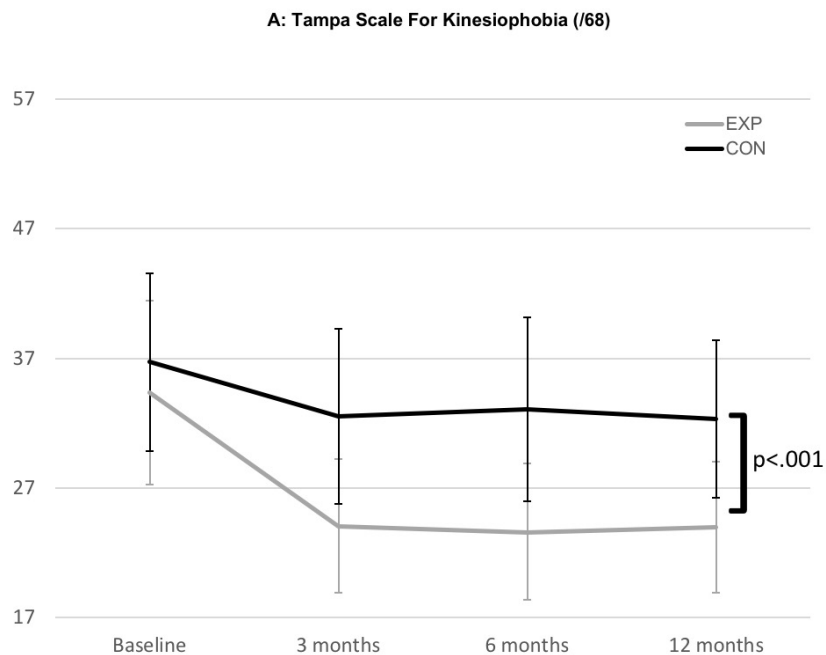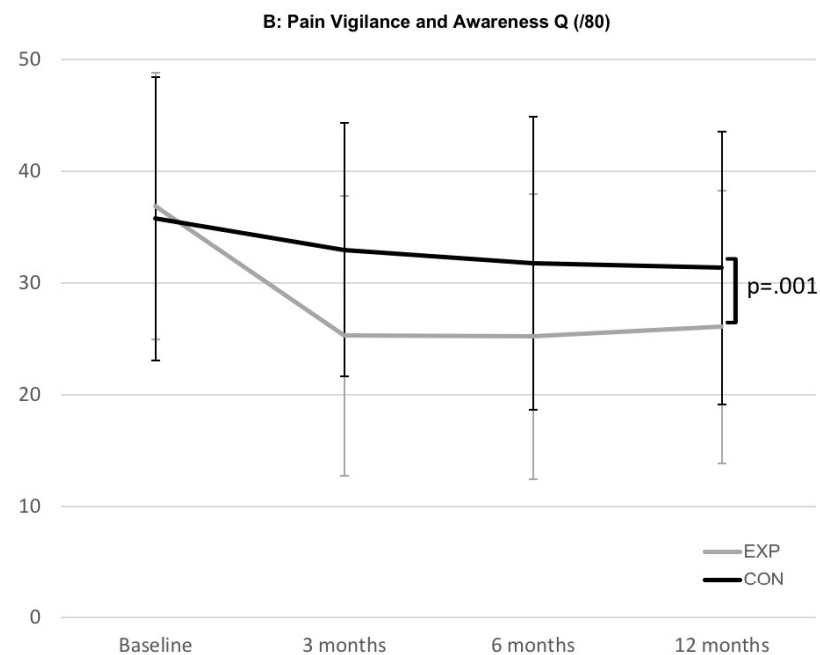

**eFigure 3: Pain neuroscience education combined with cognition-targeted motor control training (EXP) is effective for reducing fear of movement pain pressure thresholds (A) and for reducing pain vigilance and awareness (B), compared to current best evidence physiotherapy (CON) in patients with chronic spinal pain (n=120).**

P-values at the right side of the graph represent significant interaction effects. For detailed results: see table 2. A: Significant lower levels of fear of movement at baseline when compared to 3 months, 6 months and 12 months follow-up in the modern neuroscience group ( $p < .001$ ) and the current best evidence physiotherapy group ( $p < .007$ ). Additionally, at 3 months ( $p < .001$ ), 6 months ( $p < .001$ ) and 12 months ( $p < .001$ ) significant lower levels in the modern neuroscience group compared to the current best evidence physiotherapy group. B: Significant lower pain vigilance and awareness levels at baseline when compared to 3 months, 6 months and 12 months follow-up in the modern neuroscience group ( $p < .001$ ) and the current best evidence physiotherapy group ( $p < .001$ ). Additionally, at 3 months ( $p = .001$ ), 6 months ( $p = .005$ ) and 12 months ( $p = .01$ ) significant lower levels in the modern neuroscience group compared to the current best evidence physiotherapy group.
